# Supplementary material
Source: MDPI journal article supplement (https://www.mdpi.com/2311-7524/9/3/292)
Supplement: s1 [file s1 › horticulturae-2212685-supplementary.pdf]

## Supplementary Materials

### Figures.

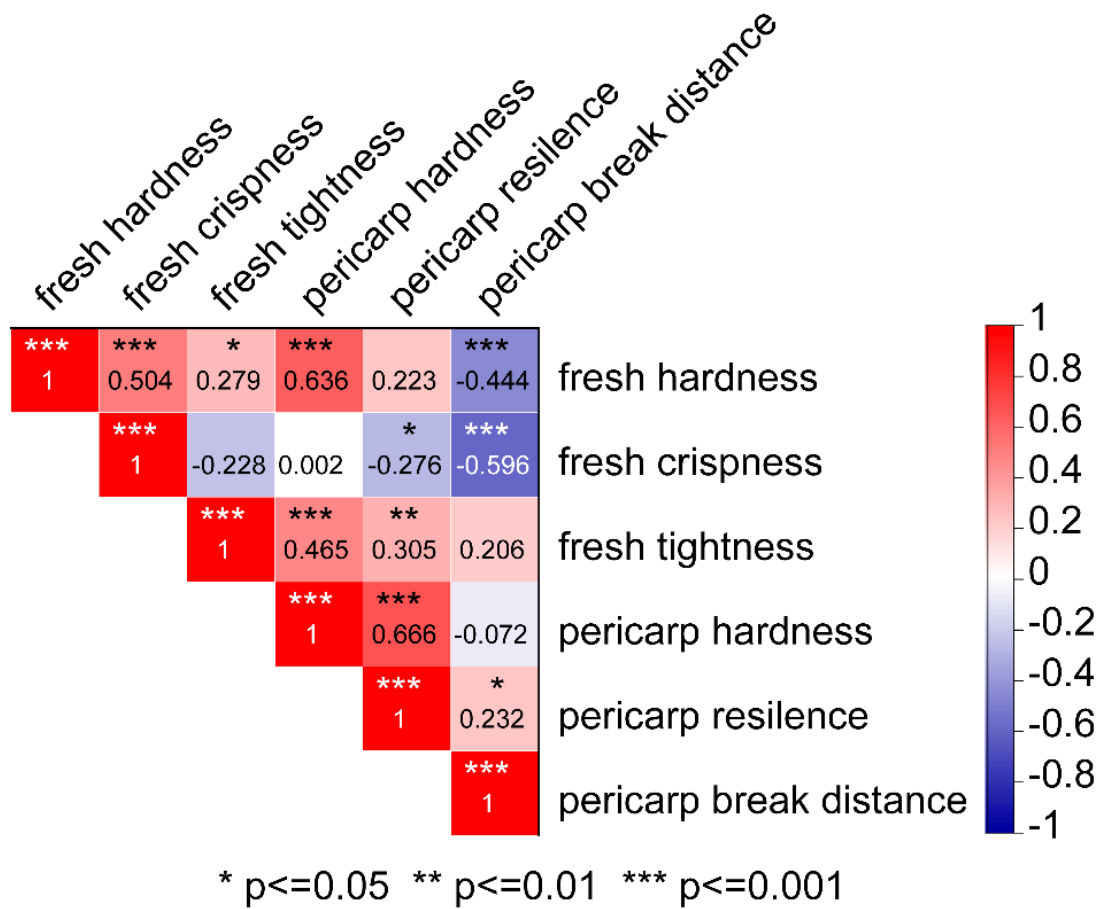

**Figure S1** Correlation analysis for six texture properties of ‘Jiguan’, ‘Yindu’, ‘Qinguan’, ‘Fuji’, ‘Huaguan’, and ‘Cripps pink’ apple fruits during postharvest. The number in each square represents the r value for Pearson analysis.

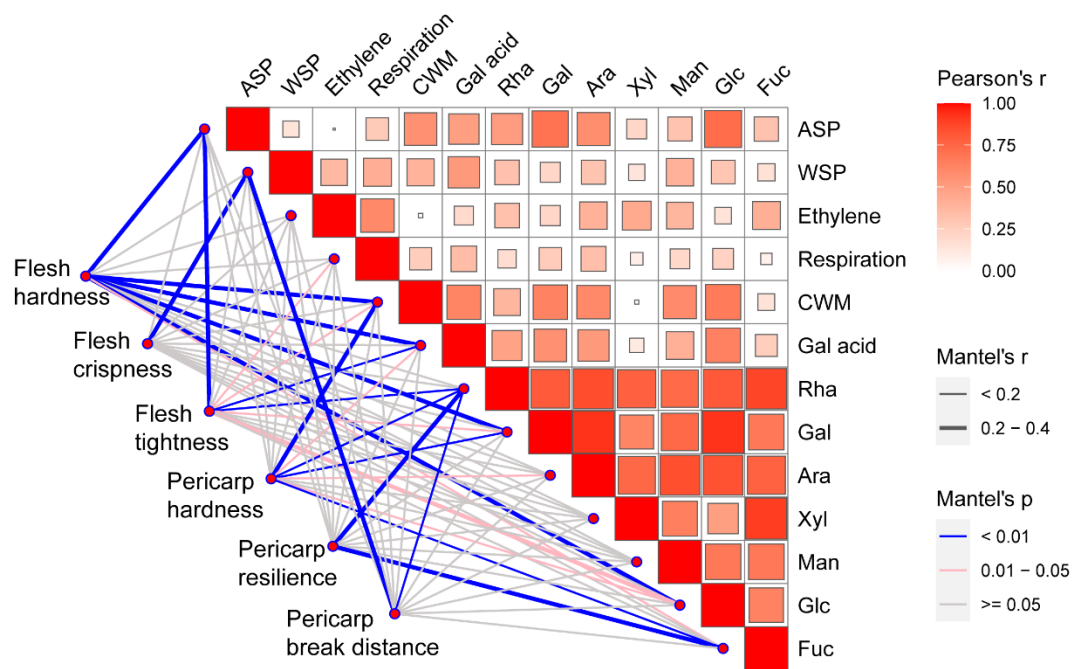

**Figure S2** Correlation analysis for texture properties, physiological indicators of ‘Jiguan’, ‘Yindu’, ‘Qinguan’, ‘Fuji’, ‘Huaguan’, and ‘Cripps pink’ apple fruits during postharvest. A Mantel test was used for the six texture properties and thirteen physiological indicators and Pearson for the thirteen physiological indicators. The size and color of the square represent the correlation coefficient of indicators for Pearson. The coarseness and color of the line represent the correlation coefficient of indicators for the Mantel test.

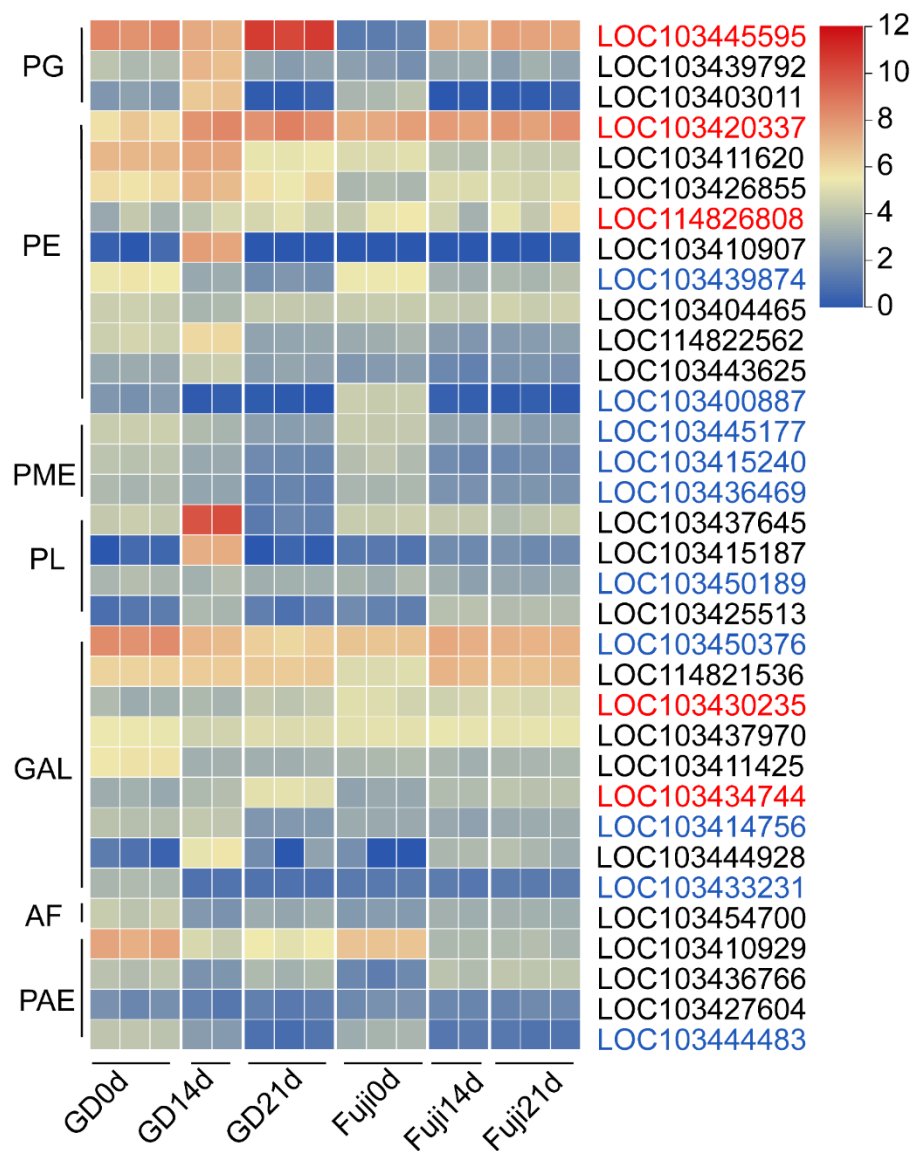

**Figure S3** Expression profiles of cell wall-related gene from ‘Golden Delicious’ and ‘Fuji’ in RNA-Seq data. fruits stored were at room temperature (20 °C) for 14 and 21 days. Data represented the mean RPKM value of three biological replicates. The names in red represent genes, which were consistently up-regulated in ‘Golden Delicious’ apples from 0 to 14 to 21 days, those in blue were consistently down-regulated genes. PG, polygalacturonase; PE, pectinesterase; PME: pectin methylesterase; PL, pectatelyase; GAL: galactosidase; AF: arabinofuranosidase; PAE: pectin acetylerase.

## Tables

**Table S1** Program for apple texture using TA-XT Plus (Stable Micro Systems Ltd., Godalming, UK)

| Step No. | Method                                                                 |
|----------|------------------------------------------------------------------------|
| 1        | Clear Graph Results                                                    |
| 2        | Redraw                                                                 |
| 3        | Search Forwards                                                        |
| 4        | Go to Min. Time                                                        |
| 5        | Drop Anchor                                                            |
| 6        | Go to Absolute +ve Value Force Current Units                           |
| 7        | Mark Value [Force (Current Units)] As “F1, pericarp firmness”          |
| 8        | Drop Anchor                                                            |
| 9        | Area (Active vs Active) As “W1, pericarp resilience”                   |
| 10       | Mark Value [Distance (Current Units)] As “D1, pericarp break distance” |
| 11       | Go to Time 4 sec                                                       |
| 12       | Drop Anchor                                                            |
| 13       | Go to Time 8 sec                                                       |
| 14       | Drop Anchor                                                            |
| 15       | Mean (Active) As “F2, fresh fruit hardness”                            |
| 16       | Average Drop Off (Active) As “F3, flesh crispness”                     |
| 17       | Go to Force 0 kg                                                       |
| 18       | Drop Anchor                                                            |
| 19       | Go to Force 0 kg                                                       |
| 20       | Drop Anchor                                                            |
| 21       | Area (Active vs Active) As “W3, fruit tightness”                       |

**Table S2** Primer sequences used for Real-Time PCR Quantification

| Gene           | NCBI NO.  | Forward primer (5'→3')  | Reverse primer (5'→3') |
|----------------|-----------|-------------------------|------------------------|
| <i>MdActin</i> | 103453508 | GGCTGGATTTGCTGGTGATG    | TGCTCACTATGCCGTGCTCA   |
| <i>MdPG1</i>   | 103445595 | GGCTTATCCTTCATACACG     | ATCAGCACCATTCCTTTA     |
| <i>MdPE1</i>   | 103420337 | CGACTCGTGCTTCAGATCCA    | AGAAACGCAGTCCTGAGTCG   |
| <i>MdPE2</i>   | 114826808 | ACCCTGTTTTCTTGAATTGTTGC | CTAGCCCATGTCACCCGTTT   |
| <i>MdPE3</i>   | 103439874 | CACCCACGCTTCTTCTCTCTTAT | CTCCGACGGTTTGAGTCTGC   |
| <i>MdPE4</i>   | 103400887 | GATCACACGGGCCTAATGG     | AGCGGGTCATCCTTTCATCC   |
| <i>MdPME1</i>  | 103445177 | ACTTGCAGTGTGTAGGTCCC    | ACCGCACCCACAAATGGTAT   |
| <i>MdPME2</i>  | 103415240 | TCCCACTTACTTGCTCAACTCT  | AAGGCTCCGGAACCGGAAA    |
| <i>MdPME3</i>  | 103436469 | AGCTCCTCCTCCTACAAGTCT   | TTGCACTGCACCCACAAATG   |
| <i>MdPL1</i>   | 103450189 | GGACAAGGAGACGCCAATGA    | ATCCTGCGCAATGTTGGAGA   |
| <i>MdGAL1</i>  | 103450376 | ACTTATTGCGGCAAGCCTTC    | TGCAGACAGCTTCAACCGAG   |
| <i>MdGAL2</i>  | 103430235 | GCACAATCAGTGACCGAAGC    | TCAGTGATGGGTTTGCCACT   |
| <i>MdGAL3</i>  | 103434744 | TCACTGGGCTGACTGCAAAT    | CCATAGAAGCAATCCCATCTCA |
| <i>MdGAL4</i>  | 103414756 | GAATGCGCAGACTGATGCTG    | ATAGGAAGTGAGGTCGGGCT   |
| <i>MdGAL5</i>  | 103433231 | TCGCAAAAAGCAAGGAAGGC    | ACAGTTGAGACAATGAGACCCA |
| <i>MdPAE1</i>  | 103444483 | GCGGGAATGCTAGGGGTATC    | CCCAGCTTGAGAAGGAGGTG   |
